# Supplementary material for: Acetylation of N-terminus and two internal amino acids is dispensable for degradation of a protein that aberrantly engages the endoplasmic reticulum translocon
Source: PubMed Central journal article supplement (PMC5571791; doi:10.7717/peerj.3728), 2017-08-22

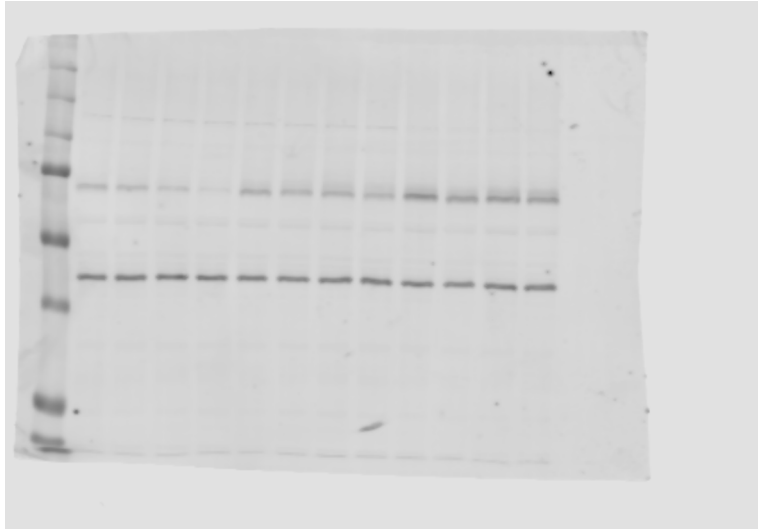

Supplement: peerj-05-3728-s003.pdf [file peerj-05-3728-s003.pdf]
